# Supplementary material
Source: MDPI journal article supplement (https://www.mdpi.com/2076-3417/12/3/1471)
Supplement: s1 [file s1]

**Table S1.** Electrical resistance ( $R$  [ $\Omega$ ]) and duration of simulation [s] results of high resolution model (HRM) excluding EPE and low resolution model (LRM) ex-/including EPE for case 1 and 2 (2.4. Application in heterogeneous tumor models).

|               | Case 1           |                            | Case 2           |                            |
|---------------|------------------|----------------------------|------------------|----------------------------|
|               | $R$ [ $\Omega$ ] | Duration of simulation [s] | $R$ [ $\Omega$ ] | Duration of simulation [s] |
| HRM excl. EPE | 138.9            | 22,156                     | 184.4            | 19,983                     |
| LRM excl. EPE | 99.1             | 1.4                        | 129.3            | 1.3                        |
| LRM incl. EPE | 112.7            | 1.4                        | 154              | 1.3                        |
